# Supplementary material for: Interactions of Mycoplasma hyopneumoniae and/or Mycoplasma hyorhinis with Streptococcus suis Serotype 2 Using In Vitro Co-Infection Models with Swine Cells
Source: MDPI journal article supplement (doi:10.3390/pathogens12070866), 2023-06-22
Supplement: s1 [file s1]

**Table S1.** Titration of *M. hyopneumoniae* and *M. hyorhinis* expressed in color-changing units per milliliter (CCU/mL) before and after pre-infection. Newborn Pig Tracheal cell line (NPTr), primary pulmonary alveolar macrophages (PAMs) and primary bone marrow-derived porcine dendritic cells (BM-DC).

| Cells  | Mycoplasma              | Before Pre-Infection (CCU/mL) | After Pre-Infection (CCU/mL) |
|--------|-------------------------|-------------------------------|------------------------------|
| NPTr   | <i>M. hyopneumoniae</i> | $5 \times 10^8$               | $5 \times 10^8$              |
|        | <i>M. hyorhinis</i>     | $4.5 \times 10^6$             | $1.95 \times 10^8$           |
| PAMs   | <i>M. hyopneumoniae</i> | $1.95 \times 10^7$            | $2.45 \times 10^8$           |
|        | <i>M. hyorhinis</i>     | $3.5 \times 10^6$             | $3.5 \times 10^8$            |
| BM-DCs | <i>M. hyopneumoniae</i> | $4.5 \times 10^7$             | $4.5 \times 10^8$            |
|        | <i>M. hyorhinis</i>     | $3.5 \times 10^5$             | $3 \times 10^8$              |

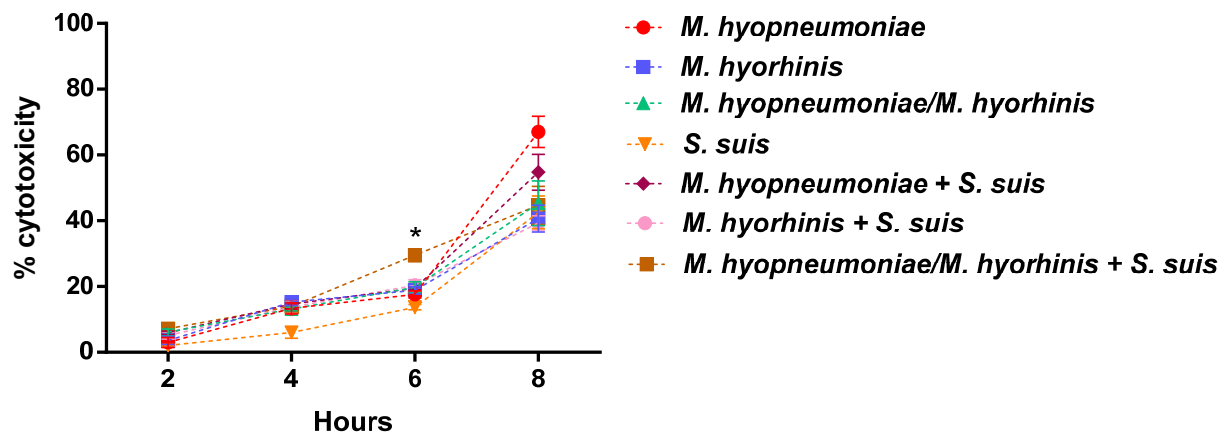

**Supplementary Figure S1.** Percent cytotoxicity of BM-DCs. After pre-infection of BM-DCs with *M. hyopneumoniae* and/or *M. hyorhinis*, cells were infected with *S. suis* from 2 h to 8 h for BM-DCs at a multiplicity of infection (MOI) of 1. Data represent mean  $\pm$  SEM (n = 4). \* ( $p < 0.005$ ) shows a significant difference between cells pre-infected with mycoplasma + *S. suis* and cells infected with *S. suis* only or cells pre-infected with mycoplasma only using non-parametric Mann-Whitney test.
